# $\beta$ -Hemolysin/Cytolysin of Group B *Streptococcus* Enhances Host Inflammation but Is Dispensable for Establishment of Urinary Tract Infection

Ritwij Kulkarni, Tara M. Randis, Swati Antala, Alice Wang, Fábio E. Amaral, Adam J. Ratner\*

Department of Pediatrics, Columbia University, New York, New York, United States of America

## Abstract

Group B *Streptococcus* (GBS; *Streptococcus agalactiae*) is a major human pathogen that disproportionately affects neonates and women in the peripartum period and is an emerging cause of infection in older adults. The primary toxin of GBS,  $\beta$ -hemolysin/cytolysin ( $\beta$ H/C), has a well-defined role in the pathogenesis of invasive disease, but its role in urinary tract infection (UTI) is unknown. Using both in vitro and in vivo models, we analyzed the importance of  $\beta$ H/C in GBS uropathogenesis. There were no significant differences in bacterial density from the bladders or kidneys from mice infected with wild-type or isogenic  $\beta$ H/C-deficient GBS, and competitive indices from co-infection experiments were near 1. Thus,  $\beta$ H/C is dispensable for the establishment of GBS-UTI. However,  $\beta$ H/C-sufficient GBS induced a more robust proinflammatory cytokine response in cultured bladder epithelial cells and in the urinary tracts of infected mice. Given the near ubiquity of  $\beta$ H/C-expressing strains in epidemiologic studies and the importance of local inflammation in dictating outcomes and sequelae of UTI, we hypothesize that  $\beta$ H/C-driven inflammatory signaling may be important in the clinical course of GBS-UTI.

**Citation:** Kulkarni R, Randis TM, Antala S, Wang A, Amaral FE, et al. (2013)  $\beta$ -Hemolysin/Cytolysin of Group B *Streptococcus* Enhances Host Inflammation but Is Dispensable for Establishment of Urinary Tract Infection. PLoS ONE 8(3): e59091. doi:10.1371/journal.pone.0059091

**Editor:** Samithamby Jayaseelan, Louisiana State University, United States of America

**Received:** January 14, 2013; **Accepted:** February 11, 2013; **Published:** March 7, 2013

**Copyright:** © 2013 Kulkarni et al. This is an open-access article distributed under the terms of the Creative Commons Attribution License, which permits unrestricted use, distribution, and reproduction in any medium, provided the original author and source are credited.

**Funding:** This work was supported by the National Institutes of Health (R01 AI092743, R21 AI098654 to A.J.R.; K23 HD065844, UL1 TR000040 (formerly UL1 UU024156) to T.M.R.). R.K. was supported by the Flight Attendant Medical Research Institute (YCSA\_092417). The funders had no role in study design, data collection and analysis, decision to publish, or preparation of the manuscript.

**Competing Interests:** The authors have read the journal's policy and have the following conflicts: Adam Ratner is a Section Editor at PLOS ONE. This does not alter the authors' adherence to all the PLOS ONE policies on sharing data and materials.

\* E-mail: ar127@columbia.edu

## Introduction

*Streptococcus agalactiae* (Group B *Streptococcus*, GBS) is a human pathogen with particular importance in the perinatal and neonatal period. GBS is the leading cause of invasive diseases including pneumonia, meningitis and sepsis among newborns and of peripartum and postpartum infections among women [1]. In addition, there is a growing appreciation of the role of GBS as a pathogen of non-pregnant adults, particularly among the elderly and those with diabetes mellitus [2]. Due to the establishment of guidelines for screening and intrapartum antibiotic prophylaxis in pregnancy, the incidence of early-onset GBS diseases of neonates has decreased, but the burden of adult GBS diseases has remained substantial [3]. GBS is a cause of urinary tract infections (UTI) in adults, and clinical presentations may range from asymptomatic bacteriuria to cystitis, pyelonephritis, and urosepsis. In pregnant women, UTI caused by GBS is associated with high-level vaginorectal colonization and is a risk factor for complications including chorioamnionitis and neonatal GBS disease [4,5]. Despite its clinical importance, a detailed understanding of the pathogenesis of GBS-UTI remains elusive. In several studies employing murine models, GBS has been demonstrated to bind urothelium and activate a bladder cytokine response within 24 h of infection [6–8]. Such responses appear to be distinct from and relatively modest compared to those elicited by uropathogenic *Escherichia coli* [8]. Klein et al. found that capsular sialic acid was

a critical component of GBS-mediated inflammation during infection [7], but the role of other virulence factors remains unclear.

In this study, we undertook a comprehensive analysis of the role of the pore-forming  $\beta$ -hemolysin/cytolysin ( $\beta$ H/C) in GBS UTI. Nearly all clinical GBS isolates produce  $\beta$ H/C, which is an important virulence factor involved in the invasion of human epithelial cells and release of pro-inflammatory cytokines [9].  $\beta$ H/C is involved in many clinical sequelae associated with GBS infection such as meningitis and sepsis [10]. Consistent with prior reports [7], we noted that  $\beta$ H/C was not required for establishment of UTI in a murine model. However, we found that GBS induces proinflammatory cytokine production in a  $\beta$ H/C-dependent manner both in vitro and in vivo. Because of its effect on host inflammatory responses, GBS  $\beta$ H/C may be an important factor in UTI pathogenesis and sequelae.

## Methods

### Ethics Statement

This study was approved by the Columbia University Institutional Animal Care and Use Committee.

### Bacterial strains, cell lines and reagents

GBS wild type (WT) strain CNCTC 10/84 (1169-NT1; ATCC 49447, serotype V) [11], the isogenic,  $\beta$ H/C-deficient *cylE* $\Delta$ cat

mutant ( $\Delta$ *cylE*), and the trans-complemented strain  $\Delta$ *cylE*+pJC10.E [12] were generous gifts from Dr. Victor Nizet (University of California, San Diego). We generated a spontaneous streptomycin mutant of the WT strain for use in animal infection experiments. In order to prepare the frozen starter cultures, overnight cultures of GBS were diluted 1:40 in sterile tryptic soy (TS) broth, grown to  $OD_{600} = 0.6$ , and stored in 1 ml aliquots in TS with 20% sterile glycerol at  $-80^{\circ}\text{C}$ . On the day of the experiment, the frozen starters of GBS strains were thawed, washed in TS broth, and grown in fresh TS broth at  $37^{\circ}\text{C}$  without shaking to  $OD_{600} = 0.6$ – $0.8$ . Bacterial density was confirmed by serial dilution with quantitative culture. Human bladder epithelial carcinoma cell line 5637 was purchased from ATCC (HTB-9) and maintained in RPMI (ATCC) with 10% fetal bovine serum at  $37^{\circ}\text{C}$  in a humidified atmosphere with 5%  $\text{CO}_2$ .

### Mouse model of ascending UTI

6–8 week old female C57Bl/6J mice were infected with  $10^7$  colony-forming units (CFU) of GBS WT or  $\Delta$ *cylE* in 50  $\mu\text{l}$  volume instilled at a slow rate (10  $\mu\text{l}/\text{sec}$ ) by transurethral catheterization using a well-lubricated sterile soft polyethylene catheter. Mice were euthanized 1, or 5 days post-infection, and bladders, kidneys and urine samples were collected in a sterile fashion. Serial dilutions of organ homogenates or urine samples were cultured on TS agar plates in order to quantify bacterial load. Bladder or kidney halves were stored in RNAlater (Ambion) for RNA isolation using the RNAqueous-4-PCR (Ambion) kit according to the manufacturer's instructions. For competition experiments, WT and KO bacteria were mixed in a 1:1 ratio prior to introduction into transurethral infection. At 1, or 5 days post-infection organs (bladder and kidneys) were harvested from each infected mouse. Each organ homogenate was plated on TS agar to determine total GBS density and on TS agar supplemented with 100  $\mu\text{g}/\text{ml}$  streptomycin to determine specifically the density of the WT strain. Competitive index (CI) was calculated as  $[(\text{WT CFU recovered}/\text{WT CFU inoculated}) \div (\Delta$ *cylE* CFU recovered/ $\Delta$ *cylE* CFU inoculated)]. A CI value of 1 indicates equivalent fitness;  $\text{CI} > 1$  indicates a WT fitness advantage, and  $\text{CI} < 1$  indicates a  $\Delta$ *cylE* fitness advantage.

### Epithelial cell adherence and cytokine transcription assays

Confluent ATCC 5637 cell monolayers in 24 well polystyrene plates were washed with serum-free RPMI medium. Cells were then infected with log-phase cultures of WT or  $\Delta$ *cylE* strains ( $\text{MOI} = 10$ ) and incubated at  $37^{\circ}\text{C}$ , 5%  $\text{CO}_2$  for 1 h. Bacterial inocula were enumerated by dilution plating on TS agar plates (Inoculum CFU; IC). Following the incubation, cell-free supernatants were collected for lactate dehydrogenase (LDH) assay to determine cell death (Roche). 5637 cells were washed three times to remove non-adherent bacteria and adherent CFUs determined (Adherent CFU; AC). % adhesion was determined as  $(\text{AC} \div \text{IC}) \times 100$ . RNA from washed 5637 cells was extracted as described below.

### RNA extraction, reverse transcription and quantitative real-time PCR (qRT-PCR)

Total RNA from mouse organs or 5637 human bladder carcinoma cell line was extracted using the RNAqueous-4-PCR RNA extraction kit as above. RNA was reverse transcribed to cDNA using the high capacity cDNA reverse transcription kit (Applied Biosystems.) qRT-PCR was carried out using Power SYBR-Green Master Mix in a StepOne Plus thermal cycler (Applied Biosystems). The list of primers used for qRT-PCR is

**Table 1.** Primers used for qRT-PCR.

| Primer Name*       | Sequence                           | Reference  |
|--------------------|------------------------------------|------------|
| hIL-1 $\alpha$ FOR | GAC TCA GGC TTA AGC TGC CA         | this study |
| hIL-1 $\alpha$ REV | CCT TCC CGT TGG TTG CTA CT         |            |
| hIL-6 FOR          | AAG AGT AAC ATG TGT GAA AGC        | [18]       |
| hIL-6 REV          | CTA CTC TCA AAT CTG TTC TGG        |            |
| hIL-8 FOR          | TTG GCA GCC TTC CTG ATT TC         | [18]       |
| hIL-8 REV          | TAT GCA CTG ACA TCT AAG TTC TTT AG |            |
| hGAPDH FOR         | GGGCGC CTG GTC ACC AGG GCT G       | [18]       |
| hGAPDH REV         | GGG GCC ATC CAC AGT CTT CTG        |            |
| mIFN $\beta$ FOR   | AAC TCC ACC AGC AGA CAG TG         | [18]       |
| mIFN $\beta$ REV   | GTG GAG AGC AGT TGA GGA CA         |            |
| mRANTES FOR        | TCG TGC CCA CGT CAA GGAGTA TTT     | this study |
| mRANTES REV        | TCT TCT CTG GGT TGG CAC ACA CTT    |            |
| mKC FOR            | CCG CGC CTA TCG CCA ATG AGC TGC GC | this study |
| mKC REV            | CTT GGG GAC ACC TTA GCA TCT TTT GG |            |
| mMCP-1 FOR         | ATC CCA ATG AGT AGG CTG GAG AGC    | this study |
| mMCP-1 REV         | CAG AAG TGC TTG AGG TGG TTG TG     |            |
| mIL-6 FOR          | GGT CCT GGT CCT TAG CCA CTC        | [18]       |
| mIL-6 REV          | TGA TGC ACT TGC AGA AAA CAA        |            |
| mTNF- $\alpha$ FOR | ATG AGC ACA GAA AGC ATG ATC        | this study |
| mTNF- $\alpha$ REV | TAC AGG CTT GTC ACT CGA ATT        |            |
| mIL-1 $\alpha$ FOR | CGA AGA CTA CAG TTC TGC CAT T      | this study |
| mIL-1 $\alpha$ REV | GAC GTT TCA GCG GTT CTC AGA G      |            |
| mActin FOR         | CCT TTG AAA AGA AAT TTG TCC        | [18]       |
| mActin REV         | AGA AAC CAG AAC TGA AAC TGG        |            |

\*m and h denote mouse and human specificity of the primers.  
doi:10.1371/journal.pone.0059091.t001

shown in the Table 1. Relative quantification (RQ) values were calculated using a comparative threshold cycle ( $\Delta\Delta\text{CT}$ ) program on the StepOne software version 2.0.

### Statistical Analysis

CFU/ml data from animal infections were compared using Mann-Whitney test, cytokine transcription and adherence frequency data were compared by t test or ANOVA using Prism 4 software (GraphPad). A  $P$ -value  $\leq 0.05$  was considered significant.

### Results

#### $\beta$ H/C-expressing GBS induce epithelial cell cytokine production

Using a human bladder carcinoma cell line, we observed that WT GBS induced significantly more transcription of interleukin (IL)-6, IL-8, and, to a lesser extent, IL-1 $\alpha$ , than medium alone or the  $\Delta$ *cylE* deletion mutant (Fig. 1). Importantly, the proinflammatory activity was restored to WT-like levels upon infection with *trans*-complemented  $\Delta$ *cylE* strain (Fig. 1). At this time point (1 h) there were no significant differences in cytotoxicity induced by WT,  $\Delta$ *cylE* deletion mutant, or the complemented strain as determined by LDH release assay, indicating that even at sublethal concentrations,  $\beta$ H/C may promote inflammation. WT bacteria caused discernably more lysis in bladder cells than  $\Delta$ *cylE* only after 4 h of incubation (data not shown). We also noted that following 1 h incubation, equivalent numbers (CFU/ml) of WT and  $\Delta$ *cylE*

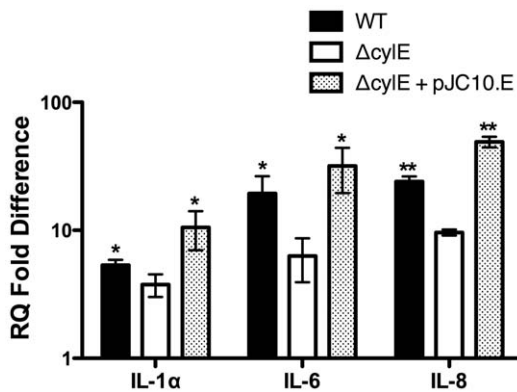

**Figure 1. GBS  $\beta H/C$  is important for induction of cytokine mRNA in human bladder epithelial cells.** Monolayers of 5637 cells were exposed to medium alone, WT,  $\Delta cylE$ , or complemented GBS strains for 1 h. Transcript levels for different proinflammatory cytokines were determined using qRT-PCR with normalization to GAPDH. RQ values were calculated by comparative CT ( $\Delta\Delta CT$ ), and fold difference over transcript levels in bacteria exposed to medium alone was determined. RQ fold difference values from triplicate readings in a representative experiment (from three biological replicates)  $\pm$  standard deviation are shown. WT and complemented strains were compared to  $\Delta cylE$  by two-tailed t tests. (*P* values for this and subsequent figures are denoted as follows: \*, *P*  $\leq$  0.05, \*\*, *P*  $\leq$  0.01, while NS refers to *P* > 0.05). doi:10.1371/journal.pone.0059091.g001

bacteria had adhered to 5637 human bladder cell line (Fig. 2). These data indicate that  $\beta H/C$  is not involved in the adherence of GBS to bladder epithelial cells but may modulate host cell signaling.

**$\beta H/C$  is dispensable for GBS UTI**

The proinflammatory nature of  $\beta H/C$  argues in favor of a role for this cytotoxin as an important virulence factor with the relevance to infection in the urinary tract. We hypothesized that in comparison to its WT counterpart,  $\Delta cylE$  GBS strain would be at a disadvantage in a mouse model of ascending urinary tract infection. However, when separately infected with  $10^7$  CFU/ml of WT or  $\Delta cylE$  strains for 24 h, we observe no significant differences by Mann-Whitney U test in number of bacteria recovered from

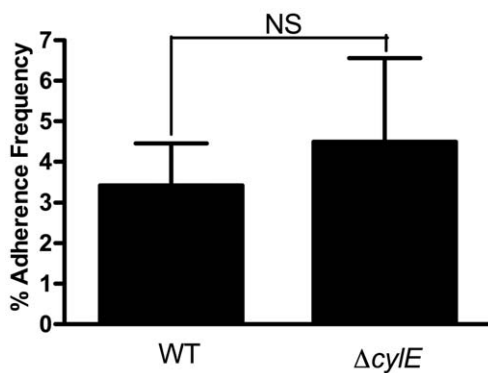

**Figure 2. GBS adhere to epithelial cells in a  $\beta H/C$ -independent fashion.** Following exposure of 5637 cells to WT or  $\Delta cylE$  GBS for 1 h, the monolayers were washed and the number of bacterial adherent to the cells was determined by quantitative culture plating. Adherence frequency was determined as the ratio of adherent to inoculum CFU, expressed as a percentage. doi:10.1371/journal.pone.0059091.g002

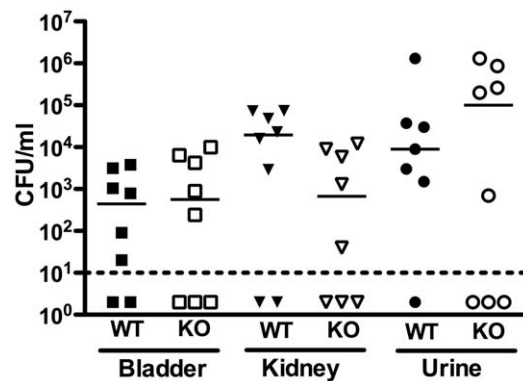

**Figure 3. GBS  $\beta H/C$  is dispensable for establishment of UTI in a murine model.** 6–8 week old female C57/Bl6J mice were infected with WT or  $\Delta cylE$  GBS strains separately by transurethral catheterization and colonization assessed at 24 h. No difference was observed in the number of CFUs recovered from bladders, kidneys or urine comparing WT (filled shapes) with  $\Delta cylE$  (open shapes) GBS. doi:10.1371/journal.pone.0059091.g003

the bladder (*P* = 0.72), kidney (*P* = 0.10), or urine (*P* = 0.96) of the animals (Fig. 3), indicating that production of  $\beta H/C$  is not required for establishment or maintenance of UTI.

In order to assess whether  $\beta H/C$  confers a subtle fitness advantage during UTI, we performed in vivo competition assays. On days 1 and 5 following infection, we found that CI values remain tightly clustered around 1, indicating that neither WT nor  $\Delta cylE$  has a fitness advantage in the mouse model of ascending UTI (Fig. 4).

Bacterial density and host response are both drivers of pathology during UTI in vivo, so we measured transcription of cytokine mRNA from murine bladders during single infection studies. Consistent with our in vitro observations using a bladder cell line, we noted significant transcriptional upregulation of proinflammatory cytokines such as IL-6, TNF- $\alpha$  and IL-1 $\alpha$  (Fig. 5) in the setting of WT GBS infection, exceeding that induced by  $\Delta cylE$ , even in the setting of similar bacterial density. This finding implicates  $\beta H/C$  as a potential driver of host inflammation in the urinary tract.

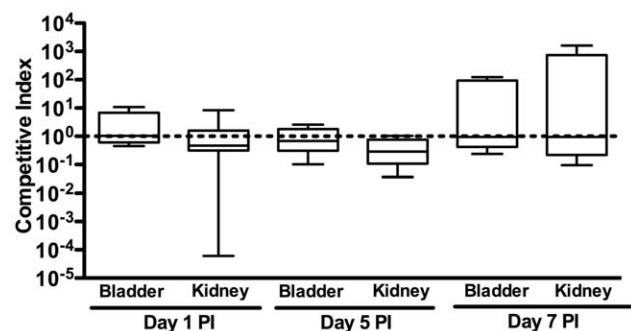

**Figure 4. No fitness advantage of  $\beta H/C$ -sufficient GBS during UTI at early or late time points.** Competition assays were performed using WT and  $\Delta cylE$  GBS and revealed competitive indices near 1, indicating an absence of fitness differences, at 1 and 5 days post-infection. doi:10.1371/journal.pone.0059091.g004

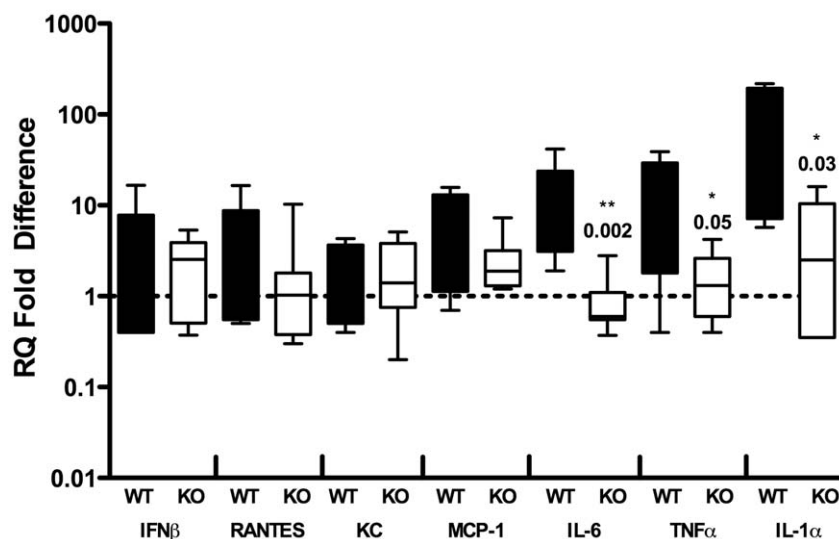

**Figure 5. Enhanced bladder inflammatory responses to WT compared to  $\beta$ H/C-deficient GBS.** Bladder tissue from WT-infected (filled boxes) animals was assessed by qRT-PCR at 24 h and demonstrated increased transcription of IL-6, IL-1 $\alpha$  and TNF- $\alpha$  compared to those receiving  $\Delta$ *cytE* GBS (empty boxes). Data were compared using Mann-Whitney *U* test; *P* values are indicated atop the boxes where appropriate. doi:10.1371/journal.pone.0059091.g005

## Discussion

The kidneys, bladder, and urine are sterile under normal conditions, but infection of these sites is exceedingly common and may be associated with substantial morbidity, especially in vulnerable patient populations. Understanding the pathogenesis of UTI is important to guide future preventive and therapeutic strategies, and a wealth of information has become available in recent years regarding both bacterial strategies for survival [13] and host detection of and defense against infection [14]. Most such studies have focused on *E. coli* and other enteric Gram-negative rods, as these are the most common agents of UTI in humans. However, it is also important to delineate the pathogenesis of less frequently isolated uropathogens, especially those such as GBS, which may affect disproportionately populations such as pregnant women and the elderly.

Clinically important GBS produce  $\beta$ H/C, a pore-forming cytotoxin that is involved in the induction of apoptosis, cytokine production, and neutrophil recruitment and is crucial for virulence in a number of diseases including pneumonia, sepsis, and meningitis [10]. We hypothesized that this factor would also have a role in the establishment and maintenance of GBS UTI. However, findings from our in vitro and in vivo assays indicated that  $\beta$ H/C is dispensable for epithelial cell adherence, bladder colonization, and ascending infection of the kidney. These findings were consistent with data described by Klein et al. [7]. In our

experiments, competition assays designed to reveal subtle fitness defects supported these conclusions as well.

Induction of local cytokine responses is a crucial first response to bacterial infections, and epithelial signaling in the bladder recruits professional immune cells required for efficient clearance of infection [15]. We found that even in the setting of equivalent bacterial numbers, the  $\beta$ H/C-deficient mutant was severely attenuated in induction of inflammation in both of our models. Inflammation drives UTI-associated symptoms [16,17], and chronic infection and sequelae distant to the urinary tract (such as premature labor) are correlated with GBS UTI and may be dependent on the magnitude or duration of inflammatory responses [17]. Thus, even in the absence of a direct effect on bacterial density during infection,  $\beta$ H/C may play an important role in UTI pathogenesis and is deserving of further investigation.

## Acknowledgments

We thank Victor Nizet for the generous gift of GBS strains 10/84, 10/84*cytE* $\Delta$ cat, and 10/84 *cytE* $\Delta$ cat + pJC10.E.

## Author Contributions

Conceived and designed the experiments: RK TMR AJR. Performed the experiments: RK TMR SA AW FEA. Analyzed the data: RK TMR SA AW FEA AJR. Wrote the paper: RK TMR AJR.

## References

- (MMWR 2009) Trends in perinatal group B streptococcal disease – United States, 2000–2006. MMWR Morb Mortal Wkly Rep 58: 109–112.
- Edwards MS, Baker CJ (2005) Group B streptococcal infections in elderly adults. Clin Infect Dis 41: 839–847.
- Van Dyke MK, Phares CR, Lynfield R, Thomas AR, Arnold KE, et al. (2009) Evaluation of universal antenatal screening for group B streptococcus. N Engl J Med 360: 2626–2636.
- Kessous R, Weintraub AY, Sergienko R, Lazer T, Press F, et al. (2012) Bacteruria with group-B streptococcus: is it a risk factor for adverse pregnancy outcomes? J Matern Fetal Neonatal Med 25: 1983–1986.
- Melin P (2011) Neonatal group B streptococcal disease: from pathogenesis to preventive strategies. Clin Microbiol Infect 17: 1294–1303.
- Ulett GC, Webb RI, Ulett KB, Cui X, Benjamin WH, et al. (2010) Group B Streptococcus (GBS) urinary tract infection involves binding of GBS to bladder uroepithelium and potent but GBS-specific induction of interleukin 1alpha. J Infect Dis 201: 866–870.
- Kline KA, Schwartz DJ, Lewis WG, Hultgren SJ, Lewis AL (2011) Immune activation and suppression by group B streptococcus in a murine model of urinary tract infection. Infect Immun 79: 3588–3595.
- Tan CK, Carey AJ, Cui X, Webb RI, Ipe D, et al. (2012) Genome-wide mapping of cystitis due to Streptococcus agalactiae and Escherichia coli in mice identifies a unique bladder transcriptome signifying pathogen-specific antimicrobial defense against urinary tract infection. Infect Immun.
- Doran KS, Chang JC, Benoit VM, Eckmann L, Nizet V (2002) Group B streptococcal beta-hemolysin/cytolysin promotes invasion of human lung epithelial cells and the release of interleukin-8. J Infect Dis 185: 196–203.
- Doran KS, Nizet V (2004) Molecular pathogenesis of neonatal group B streptococcal infection: no longer in its infancy. Mol Microbiol 54: 23–31.

11. Wilkinson HW (1977) Nontypable group B streptococci isolated from human sources. *J Clin Microbiol* 6: 183–184.
12. Pritzlaff CA, Chang JC, Kuo SP, Tamura GS, Rubens CE, et al. (2001) Genetic basis for the beta-haemolytic/cytolytic activity of group B *Streptococcus*. *Mol Microbiol* 39: 236–247.
13. Wiles TJ, Kulesus RR, Mulvey MA (2008) Origins and virulence mechanisms of uropathogenic *Escherichia coli*. *Exp Mol Pathol* 85: 11–19.
14. Nielubowicz GR, Mobley HL (2010) Host-pathogen interactions in urinary tract infection. *Nat Rev Urol* 7: 430–441.
15. Sivick KE, Mobley HL (2010) Waging war against uropathogenic *Escherichia coli*: winning back the urinary tract. *Infect Immun* 78: 568–585.
16. Linder H, Engberg I, van Kooten C, de Man P, Svanborg-Eden C (1990) Effects of anti-inflammatory agents on mucosal inflammation induced by infection with gram-negative bacteria. *Infect Immun* 58: 2056–2060.
17. Jahnukainen T, Chen M, Celsi G (2005) Mechanisms of renal damage owing to infection. *Pediatr Nephrol* 20: 1043–1053.
18. Kulkarni R, Rampersaud R, Aguilar JL, Randis TM, Kreindler JL, et al. (2010) Cigarette smoke inhibits airway epithelial cell innate immune responses to bacteria. *Infect Immun* 78: 2146–2152.
